# Supplementary material for: The Automation Technique Lab-In-Syringe: A Practical Guide
Source: PubMed Central journal article supplement (PMC7181287; doi:10.3390/molecules25071612), 2020-04-01
Supplement: molecules-25-01612-s001.pdf [file molecules-25-01612-s001.pdf]

# Automation technique Lab-In-Syringe: A practical guide

## Supplementary Materials

Burkhard Horstkotte, Petr Solich

5

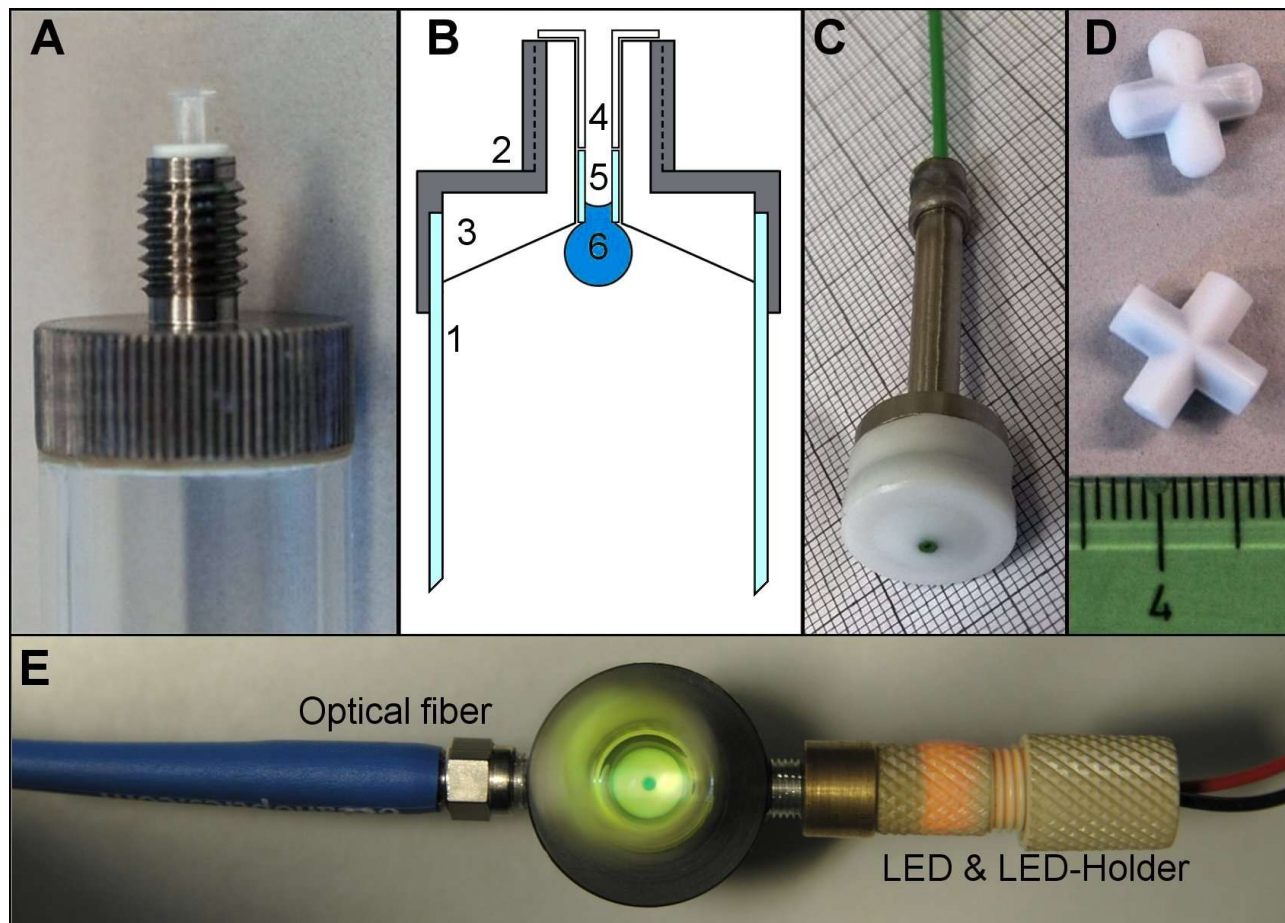

10 **Figure S1.** Details to LIS system adaptation. (A) Insert of a piece of PTFE tubing into syringe inlet to decrease diameter, (B) Decrease of inlet diameter as in A plus insert of glass capillary to increase inlet wettability and allow stable formation of a single drop for headspace extraction (1-Glass barrel, 2-Metallic casing, 3-crimp connection of PTFE, 4-PTFE tubing insert, 5-Glass capillary, 6-Drop) [19,23], (C) Syringe piston featured with secondary inlet flow line to syringe void, (D) Stirring cross, original and shaped to remain in the syringe inlet when using upside-down orientation enabling e.g. insolvent-drop stirring [51]. (E) Lightpath using a fiber adaptor for in-syringe spectrophotometric detection visualized with fluorescein.

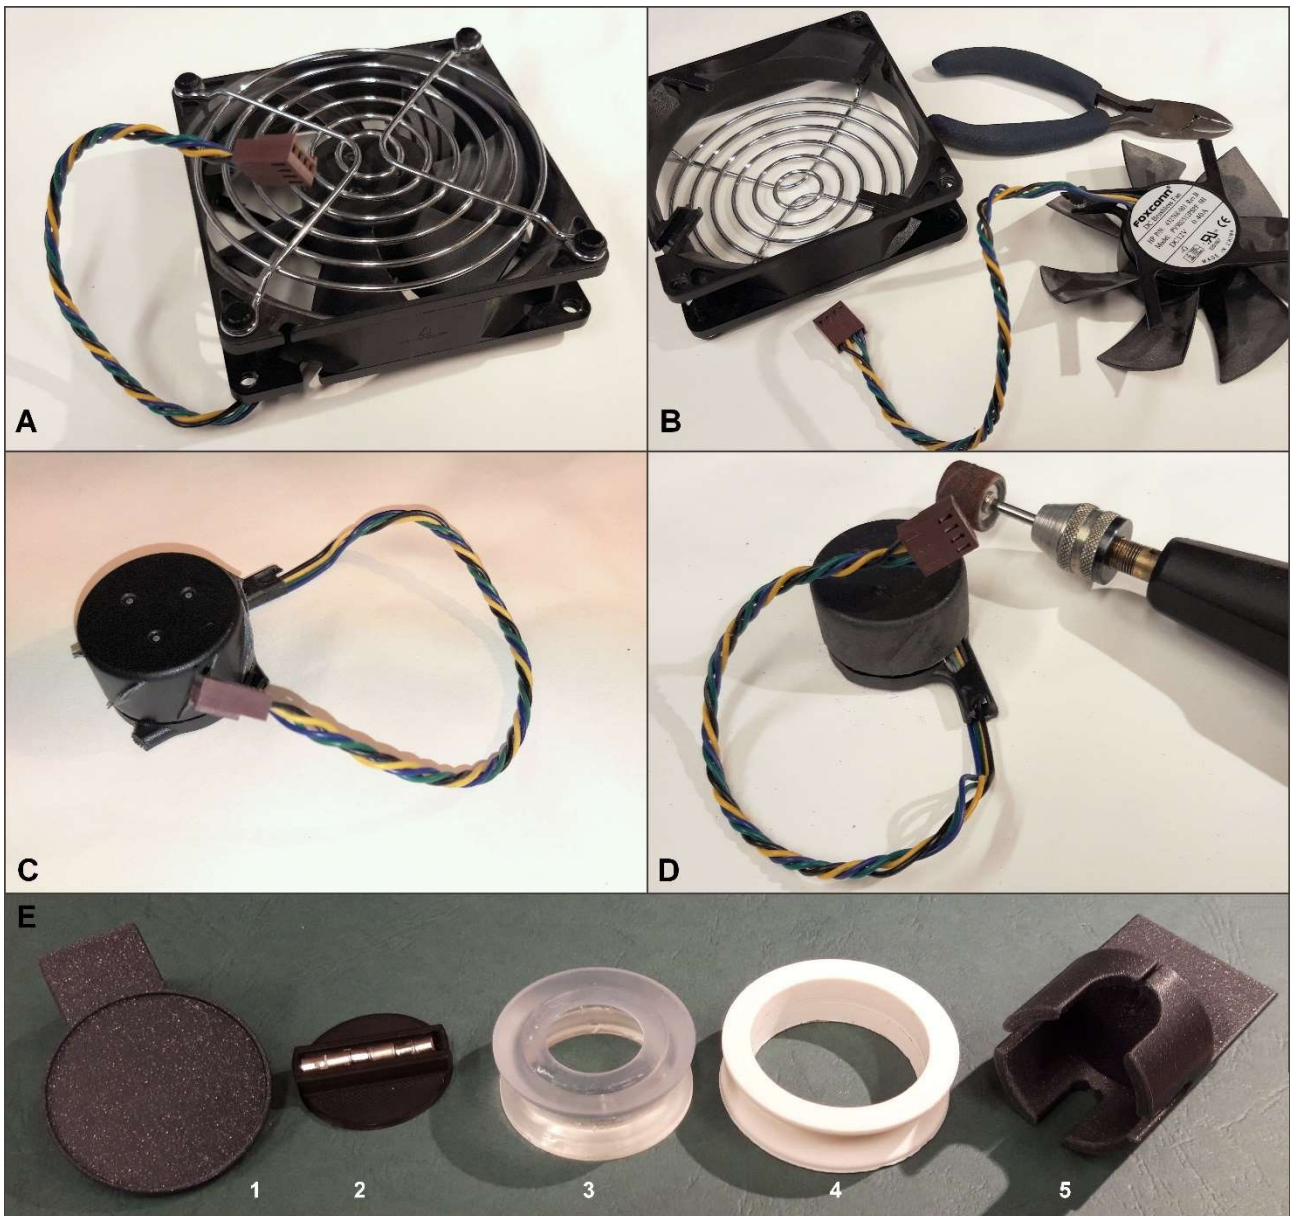

15

**Figure S2.** Preparation of a brush-less motor for in-syringe stirring. (A) Use of a computer fan with pulse-width modulation control of velocity, (B) cutting away the supporting frame, (C) breaking off all wings, (D) sanding down excess ends to obtain a smooth surface shell. (E) 3D printed motor attachments for NdFeB magnet placement (E2) or pulley-wheel function (E3, E4) and motor supports as shown in Figures 3 and 4 (E1, E5).

20

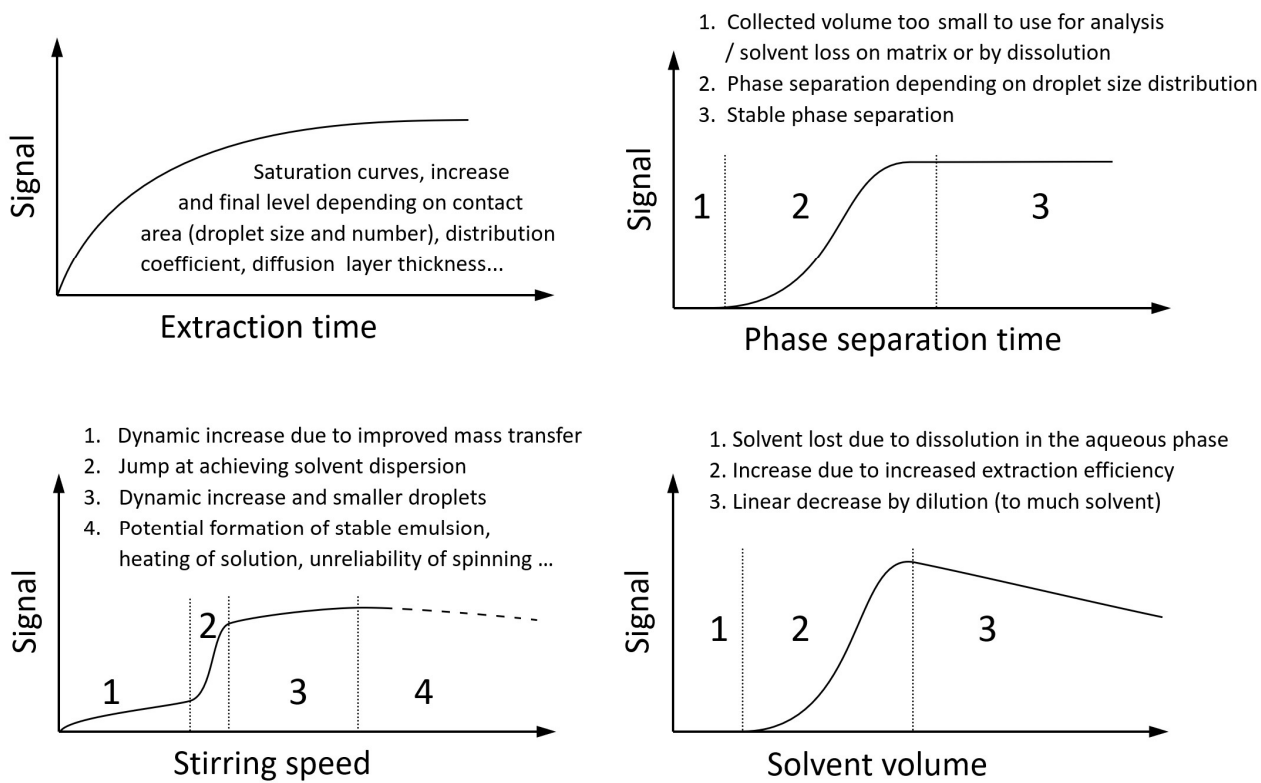

**Figure S3.** Typical signal dependencies in the optimization of DLLME protocols automated by Lab-In-Syringe.
